# Supplementary material for: Biological Characterization of 8-Cyclopropyl-2-(pyridin-3-yl)thiazolo[5,4-f]quinazolin-9(8H)-one, a Promising Inhibitor of DYRK1A
Source: MDPI journal article supplement (doi:10.3390/ph12040185), 2019-12-17

## Supporting Information

# Biological Characterization of 8-Cyclopropyl-2-(pyridin-3-yl)thiazolo[5,4-f]quinazolin-9(8H)-one, a Promising Inhibitor of DYRK1A

Corinne Fruit<sup>1</sup>, Florence Couly<sup>1</sup>, Rahul Bhansali<sup>2,3</sup>, Malini Rammohan<sup>2</sup>, Mattias F. Lindberg<sup>4</sup>, John D. Crispino<sup>2,5</sup>, Laurent Meijer<sup>4</sup>, and Thierry Besson<sup>\*1</sup>

<sup>1</sup> Normandie Univ, UNIROUEN, INSA Rouen, CNRS, COBRA UMR 6014, 76000 Rouen, France ;

[corinne.fruit@univ-rouen.fr](mailto:corinne.fruit@univ-rouen.fr) (C.F.); [florence.couly@insa-rouen.fr](mailto:florence.couly@insa-rouen.fr) (F.C.)

<sup>2</sup> Department of Medicine, Division of Hematology/Oncology, Northwestern University (Chicago, IL);

[rbhansali91@gmail.com](mailto:rbhansali91@gmail.com) (R.B.); [malini.rammohan@northwestern.edu](mailto:malini.rammohan@northwestern.edu) (M.R.); [j-crispino@northwestern.edu](mailto:j-crispino@northwestern.edu) (J.D.C.)

<sup>3</sup> College of Medicine, University of Illinois – Chicago (Chicago, IL)

<sup>4</sup> ManRos Therapeutics & Perha Pharmaceuticals, Perharidy Peninsula, 29680-Roscoff, France; [lindberg@perha-pharma.com](mailto:lindberg@perha-pharma.com) (M.L.); [meijer@perha-pharma.com](mailto:meijer@perha-pharma.com) (L.M.)

<sup>5</sup> Department of Biochemistry and Molecular Genetics, Northwestern University Feinberg School of Medicine (Chicago, IL); [j-crispino@northwestern.edu](mailto:j-crispino@northwestern.edu) (J.D.C.)

\* Correspondence: [thierry.besson@univ-rouen.fr](mailto:thierry.besson@univ-rouen.fr); +33 (0) 235-522-904 (T.B)

### Table of contents

|                                                               |    |
|---------------------------------------------------------------|----|
| 1. Chemistry work.....                                        | S2 |
| 1.2. General methods.....                                     | S2 |
| 1.3. Last step of the synthesis of (FC162).....               | S2 |
| 1.4. <sup>1</sup> H-NMR and <sup>13</sup> C-NMR of FC162..... | S3 |
| 1.5. Purity (HPLC) of FC162: Chromatogram and results.....    | S4 |

## 1. Chemistry work

### 1.2. General methods

Materials were obtained commercially and used without further purification. All reactions were carried out under inert atmosphere of argon or nitrogen and monitored by thin-layer chromatography with silica gel 60 F254 precoated aluminum plates (0.25 mm). Visualization was performed with a UV light at 254 and 312 nm. Purifications were carried out by flash column chromatography system equipped with a dual UV – vis spectrophotometer (200 – 600 nm), a frion collector (176 tubes), a dual pistopump (1 – 200 mL/min, Pmax = 15 bar), allowing quaternary gradients and an additional inlet for air purge. Samples can be injected in liquid or solid mode. Melting points of solid compounds were measured on a Stuart melting point SMP3 with a precision of  $\pm 1.5$  °C. IR spectra were recorded on a PerkinElmer Spectrum 100 series FT-IR spectrometer. Liquids and solids were applied on the section attenuated total reflectance (ATR) accessories. Absorption bands are given in  $\text{cm}^{-1}$ .  $^1\text{H}$ ,  $^{13}\text{C}$  NMR spectra were recorded at 295 K on a Bruker AVANCE 300 MHz, at 300 MHz relative to  $\text{CDCl}_3$  (residual solvent signals). Mass spectra analysis was performed by the Mass Spectrometry Laboratory of the University of Rouen. Mass spectra (ESI) were recorded with a Waters LCP 1er XR spectrometer. Microwave experiments were conducted at atmospheric pressure (RotoSYNTH, Milestone Srl, Italy) or in pressurized reactors (0 – 30 bar) (Monomode 300, Anton Paar, France) in commercial microwave reactors especially designed for synthetic chemistry. The purity of all tested compounds was determined by chromatographic analysis performed at 25 °C on Ultimate 3000 (Thermo Scientific, Les Ulis, France) with a quaternary pump equipped with a photodiode array detector (DAD) managed at 254 nm. Column was a Luna C18 (150 mm  $\times$  4.6 mm; 3  $\mu\text{m}$  particle size) provided by Phenomenex (Le Pecq, France). The mobile phase was water (A) and acetonitrile (B) (v/v); starting condition is 90% A and 10% B, in which the solvent B changed to 10% to 90% in 4% by min. Flow rate was 0.5 mL/min, and 5  $\mu\text{L}$  were injected. The percentage of purity of **FC162** was more than 98%.

### 1.3. Last step of the synthesis of (**FC162**)

Thiazolo[5,4-*f*]quinazolin-9(8*H*)-one **3** (0.341 mmol), copper iodide (0.065 g, 0.341 mmol, 1 equiv), and TBD (95 mg, 0.682 mmol, 2.0 equiv) in dry DMF (850  $\mu\text{L}$ ) were added to a 2 mL glass vial, which was sealed under argon atmosphere. The mixture was stirred under microwave irradiation at 120 °C for 10 min. Then,  $\text{Pd}(\text{OAc})_2$  (7.6 mg, 0.034 mmol, 10 mol%) and 3-iodopyridine (0.140 g, 0.682 mmol, 2.0 equiv) were added to the mixture and purged with argon. The reaction was then stirred under microwave irradiation at 120 °C for 5 h. The resulting solution was diluted with dichloromethane, and washed three times with a 5% aqueous ammonia solution, then with water and brine. The organic layer was dried over  $\text{Na}_2\text{SO}_4$  and concentrated under vacuum. The crude product was purified by flash chromatography on silica gel with  $\text{MeOH}/\text{CH}_2\text{Cl}_2$  as eluent (1/0 to 95:5; v/v), to afford the corresponding product.

8-Cyclopropyl-2-(pyridin-3-yl)thiazolo[5,4-*f*]quinazolin-9(8*H*)-one (**FC162**). Flash chromatography eluent ( $\text{MeOH}/\text{CH}_2\text{Cl}_2$ , 1/0 to 95:5; v/v), Beige powder; mp: 263-265 °C; IR (neat)  $\nu_{\text{max}}$  3059, 3012, 2114, 1659, 1588, 1449, 1344, 1295, 1024, 837  $\text{cm}^{-1}$ ;  $^1\text{H}$ -NMR ( $\text{CDCl}_3$ , 25 °C, 300 MHz):  $\delta_{\text{H}}$  9.41 (d,  $J = 2.3$  Hz, 1H,  $\text{H}_{\text{Ar}}$ ), 8.75 (d,  $J = 4.9$  Hz, 1H,  $\text{H}_{\text{Ar}}$ ), 8.54-8.38 (m, 2H,  $\text{H}_{\text{Ar}} + \text{H}^4$ ), 8.26 (s, 1H,  $\text{H}^7$ ), 7.88 (d,  $J = 8.7$  Hz, 1H,  $\text{H}^5$ ), 7.48 (dd,  $J = 8.0$  and 4.9 Hz, 1H,  $\text{H}_{\text{Ar}}$ ), 3.45-3.26 (m, 1H, NCH), 1.36-1.24 (m, 2H, CH), 1.14-0.96 (m, 2H, CH).  $^{13}\text{C}$ -NMR ( $\text{CDCl}_3$ , 75.4 MHz):  $\delta_{\text{C}}$  168.5 (C), 161.3 (C), 153.4 (C), 151.9 (CH), 148.7 (CH), 146.7 (CH), 146.6 (C), 134.7 (CH), 131.7 (C), 129.8 (C), 129.3 (CH), 126.6 (CH), 124.1 (CH), 116.4 (C), 29.8 (CH), 6.7(2  $\text{CH}_2$ ). HRMS (ESI $^+$ ):  $m/z$  calcd for  $\text{C}_{17}\text{H}_{12}\text{N}_4\text{OS}$  [ $\text{M} + \text{H}$ ] $^+$ : 321.0807; Found: 321.0810.

### 1.4. <sup>1</sup>H-NMR and <sup>13</sup>C-NMR of FC162

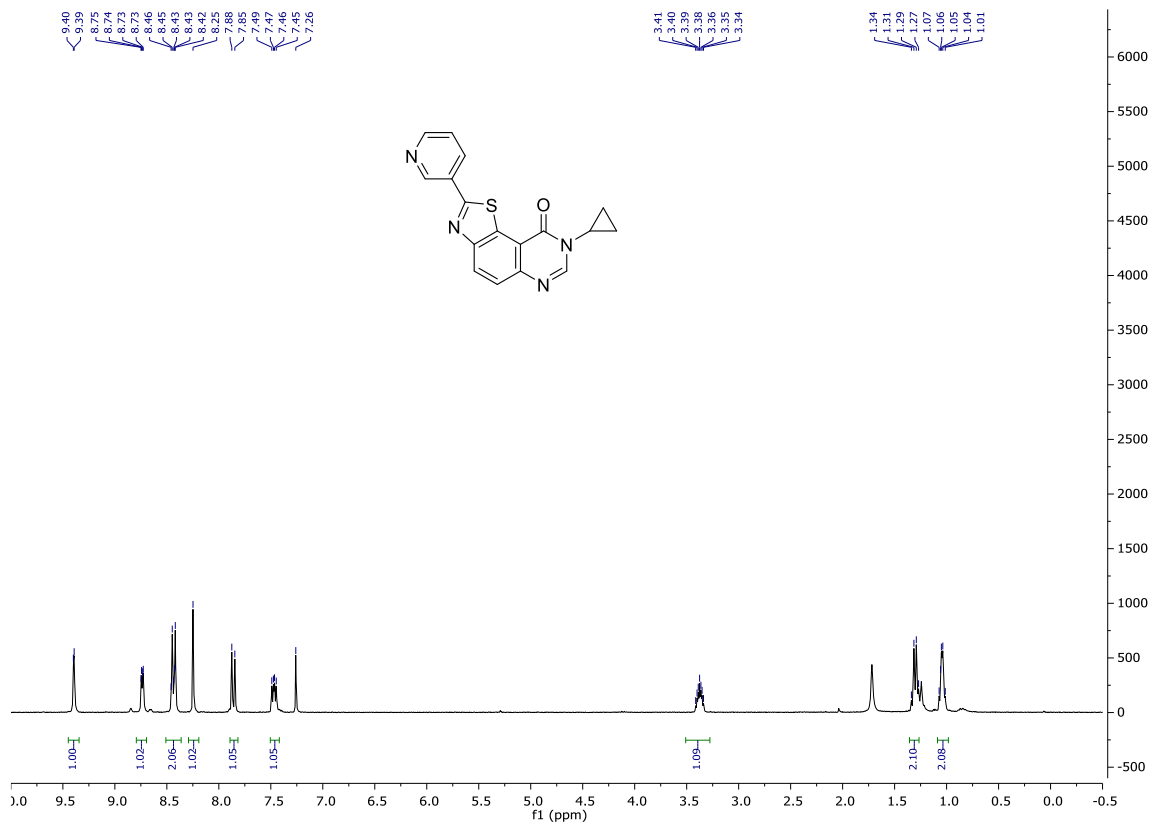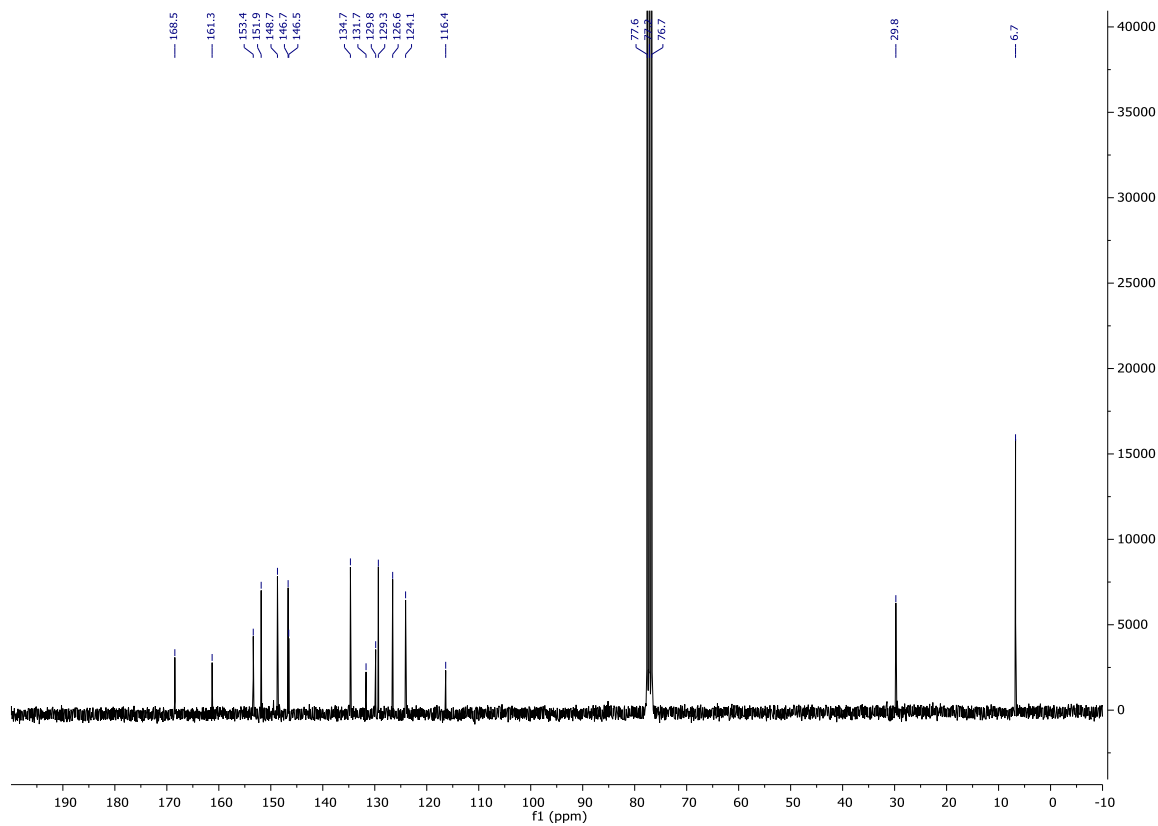

1.5. Purity (HPLC) of FC162: Chromatogram and results

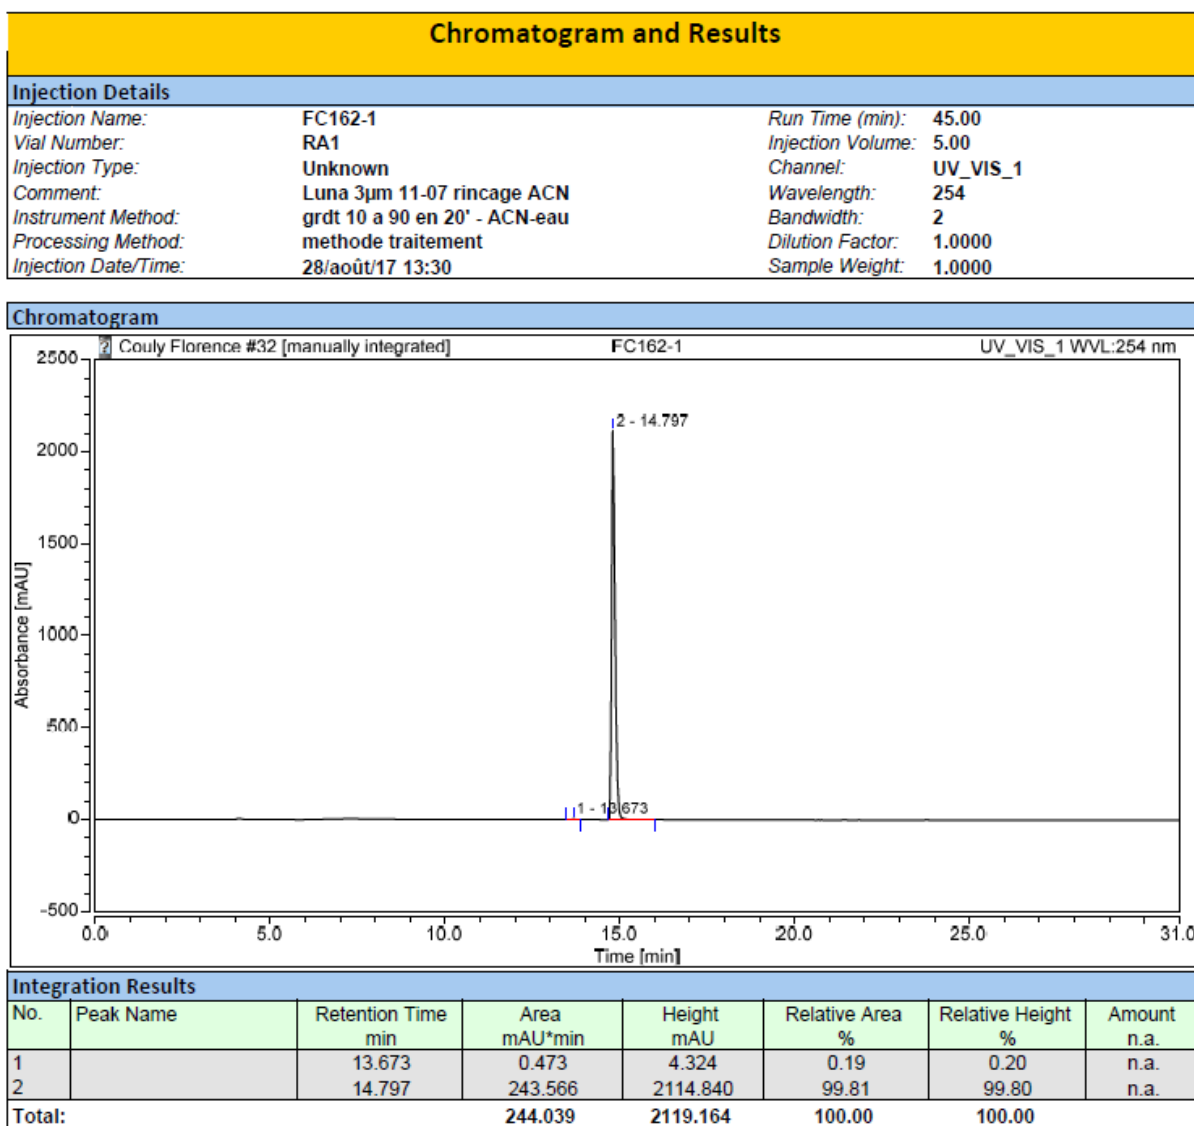

Supplement: s1 [file s1]
